# Supplementary material for: The evolution of Jen3 proteins and their role in dicarboxylic acid transport in Yarrowia
Source: PubMed Central journal article supplement (PMC4335979; doi:10.1002/mbo3.225), 2014-12-16

**YALI0B19470p**

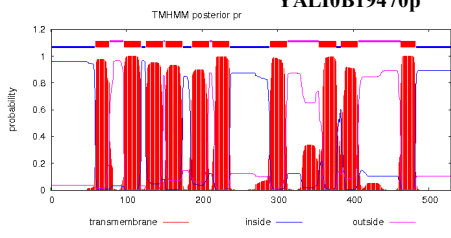

**YALI0C15488p**

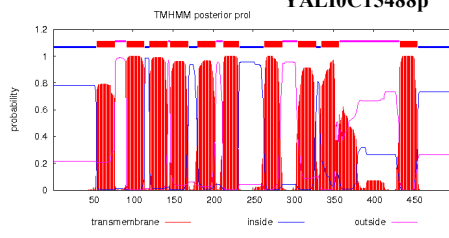

**YALI0C21406p**

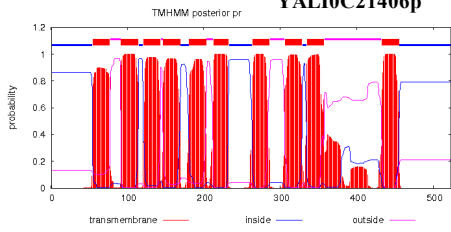

**YALI0D20108p**

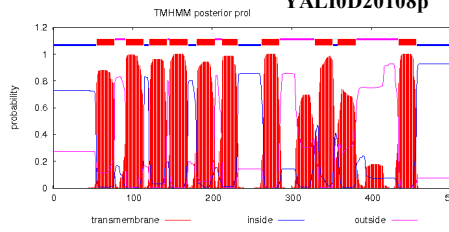

**YALI0D24607p**

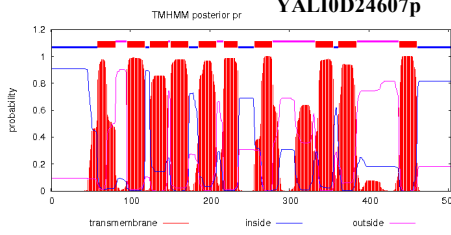

**YALI0E32901p**

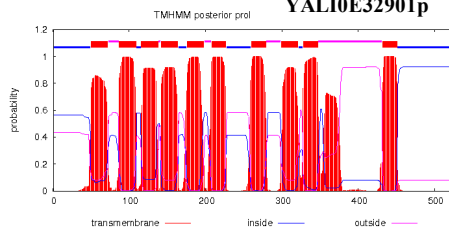

**SCJEN1p**

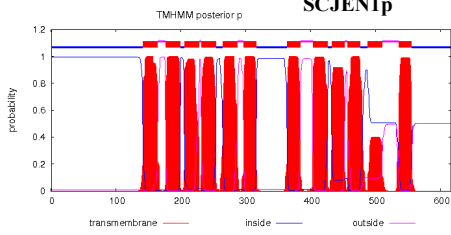

**KLJEN1p**

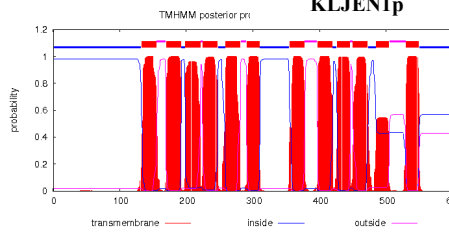

**KLJEN2p**

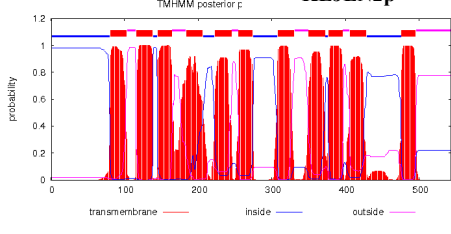

**CAJEN1p**

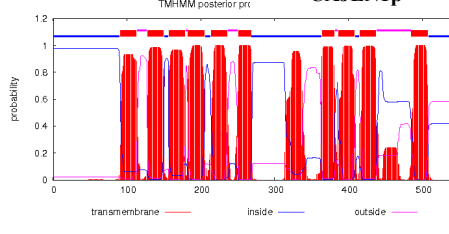

**CAJEN2p**

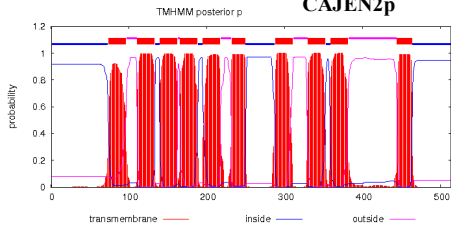

Supplement: mbo30004-0100-sd2.pdf [file mbo30004-0100-sd2.pdf]
