# Supplementary material for: The evolution of Jen3 proteins and their role in dicarboxylic acid transport in Yarrowia
Source: PubMed Central journal article supplement (PMC4335979; doi:10.1002/mbo3.225), 2014-12-16

# P01d

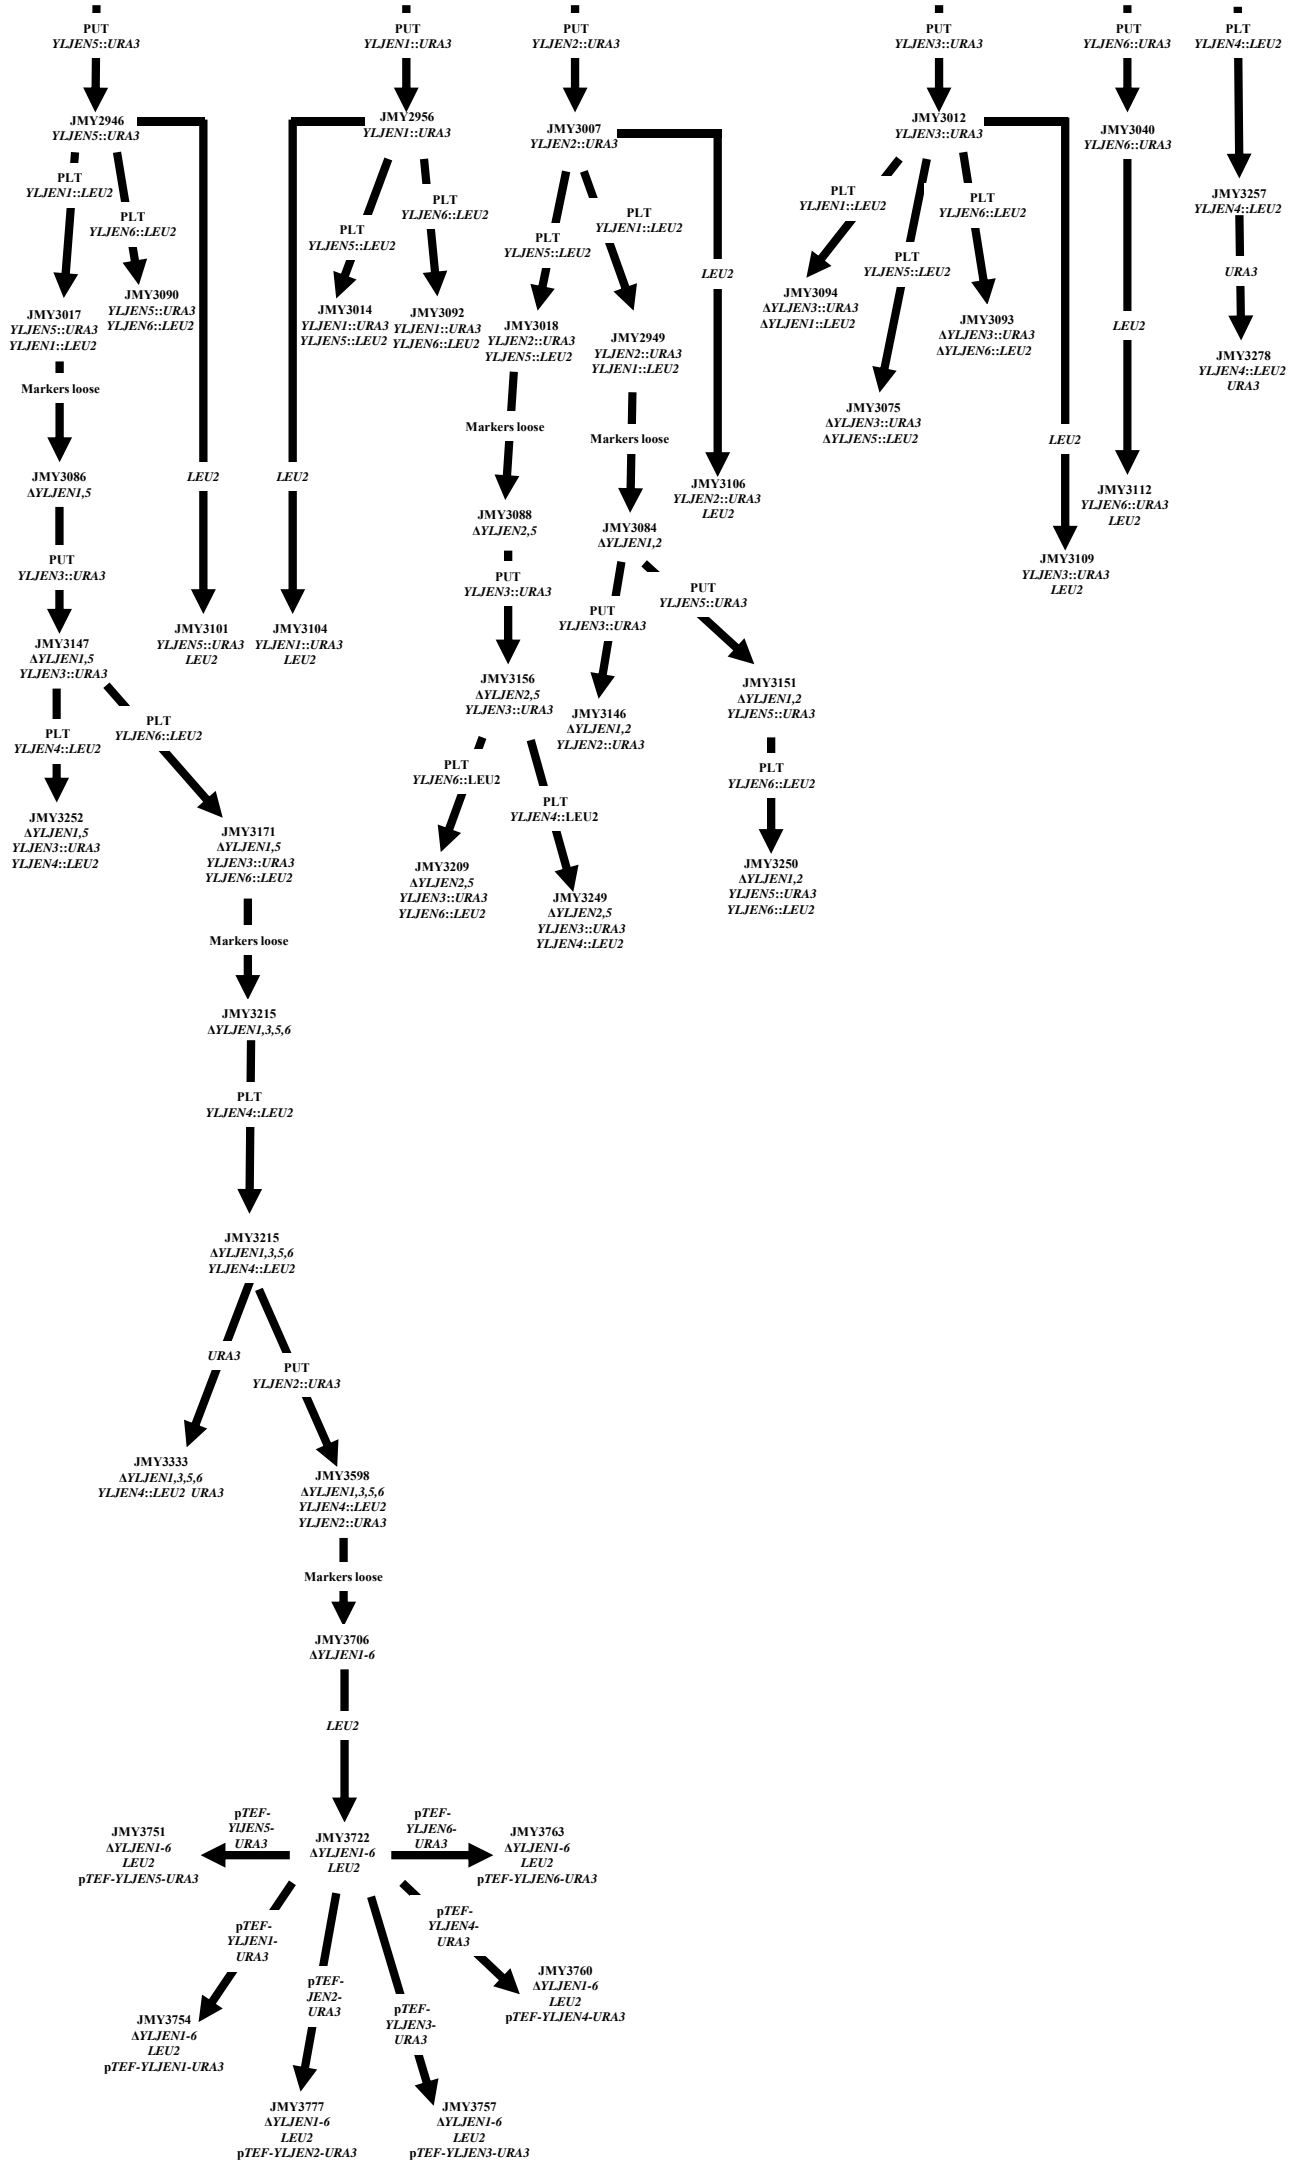

Supplement: mbo30004-0100-sd3.pdf [file mbo30004-0100-sd3.pdf]
