# Supplementary material for: The evolution of Jen3 proteins and their role in dicarboxylic acid transport in Yarrowia
Source: PubMed Central journal article supplement (PMC4335979; doi:10.1002/mbo3.225), 2014-12-16

**Acetate 0.3%**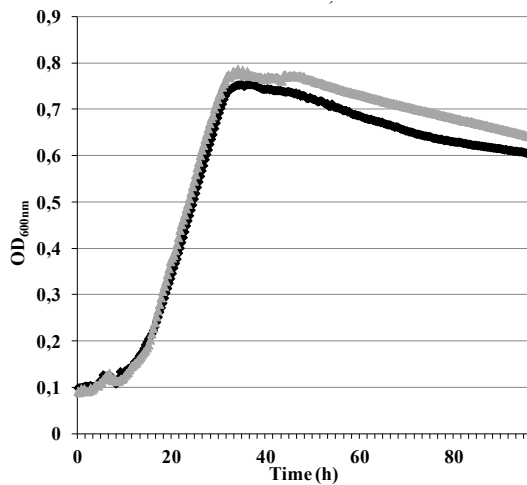**Butyrate 0.3%**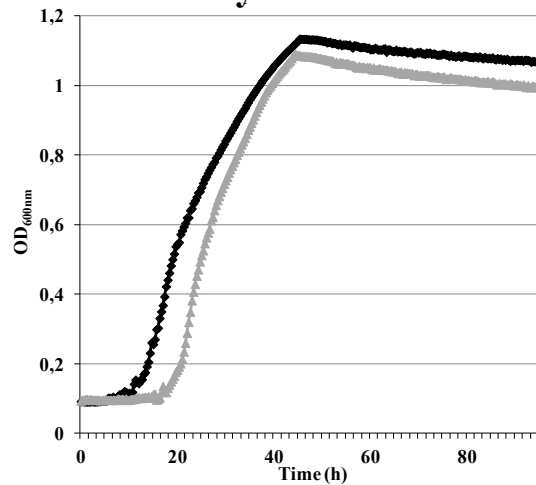**Citrate 0.3%**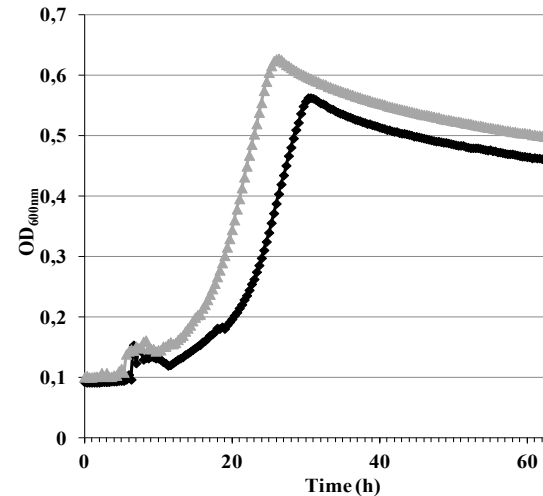**DL-Lactate 0.3%**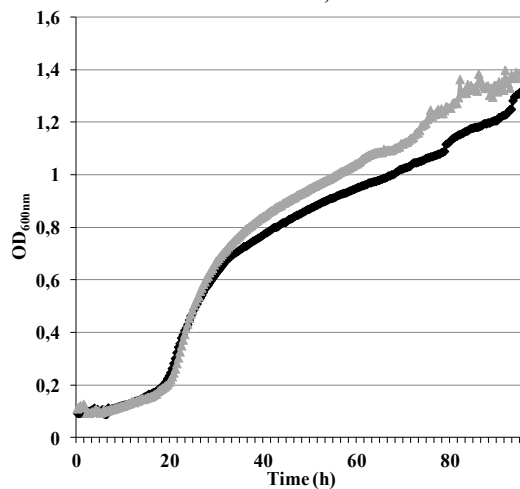**Pyruvate 0.3%**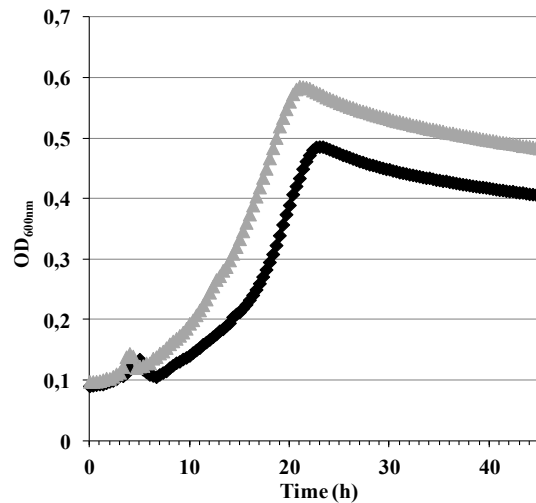**Oxaloacetate 0.3%**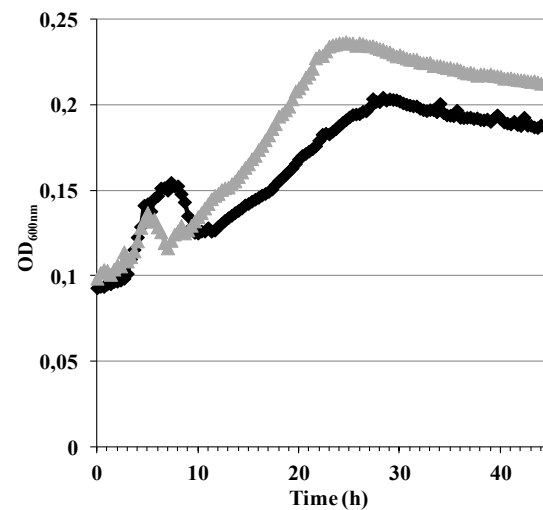

# Butyrate 0,3 %

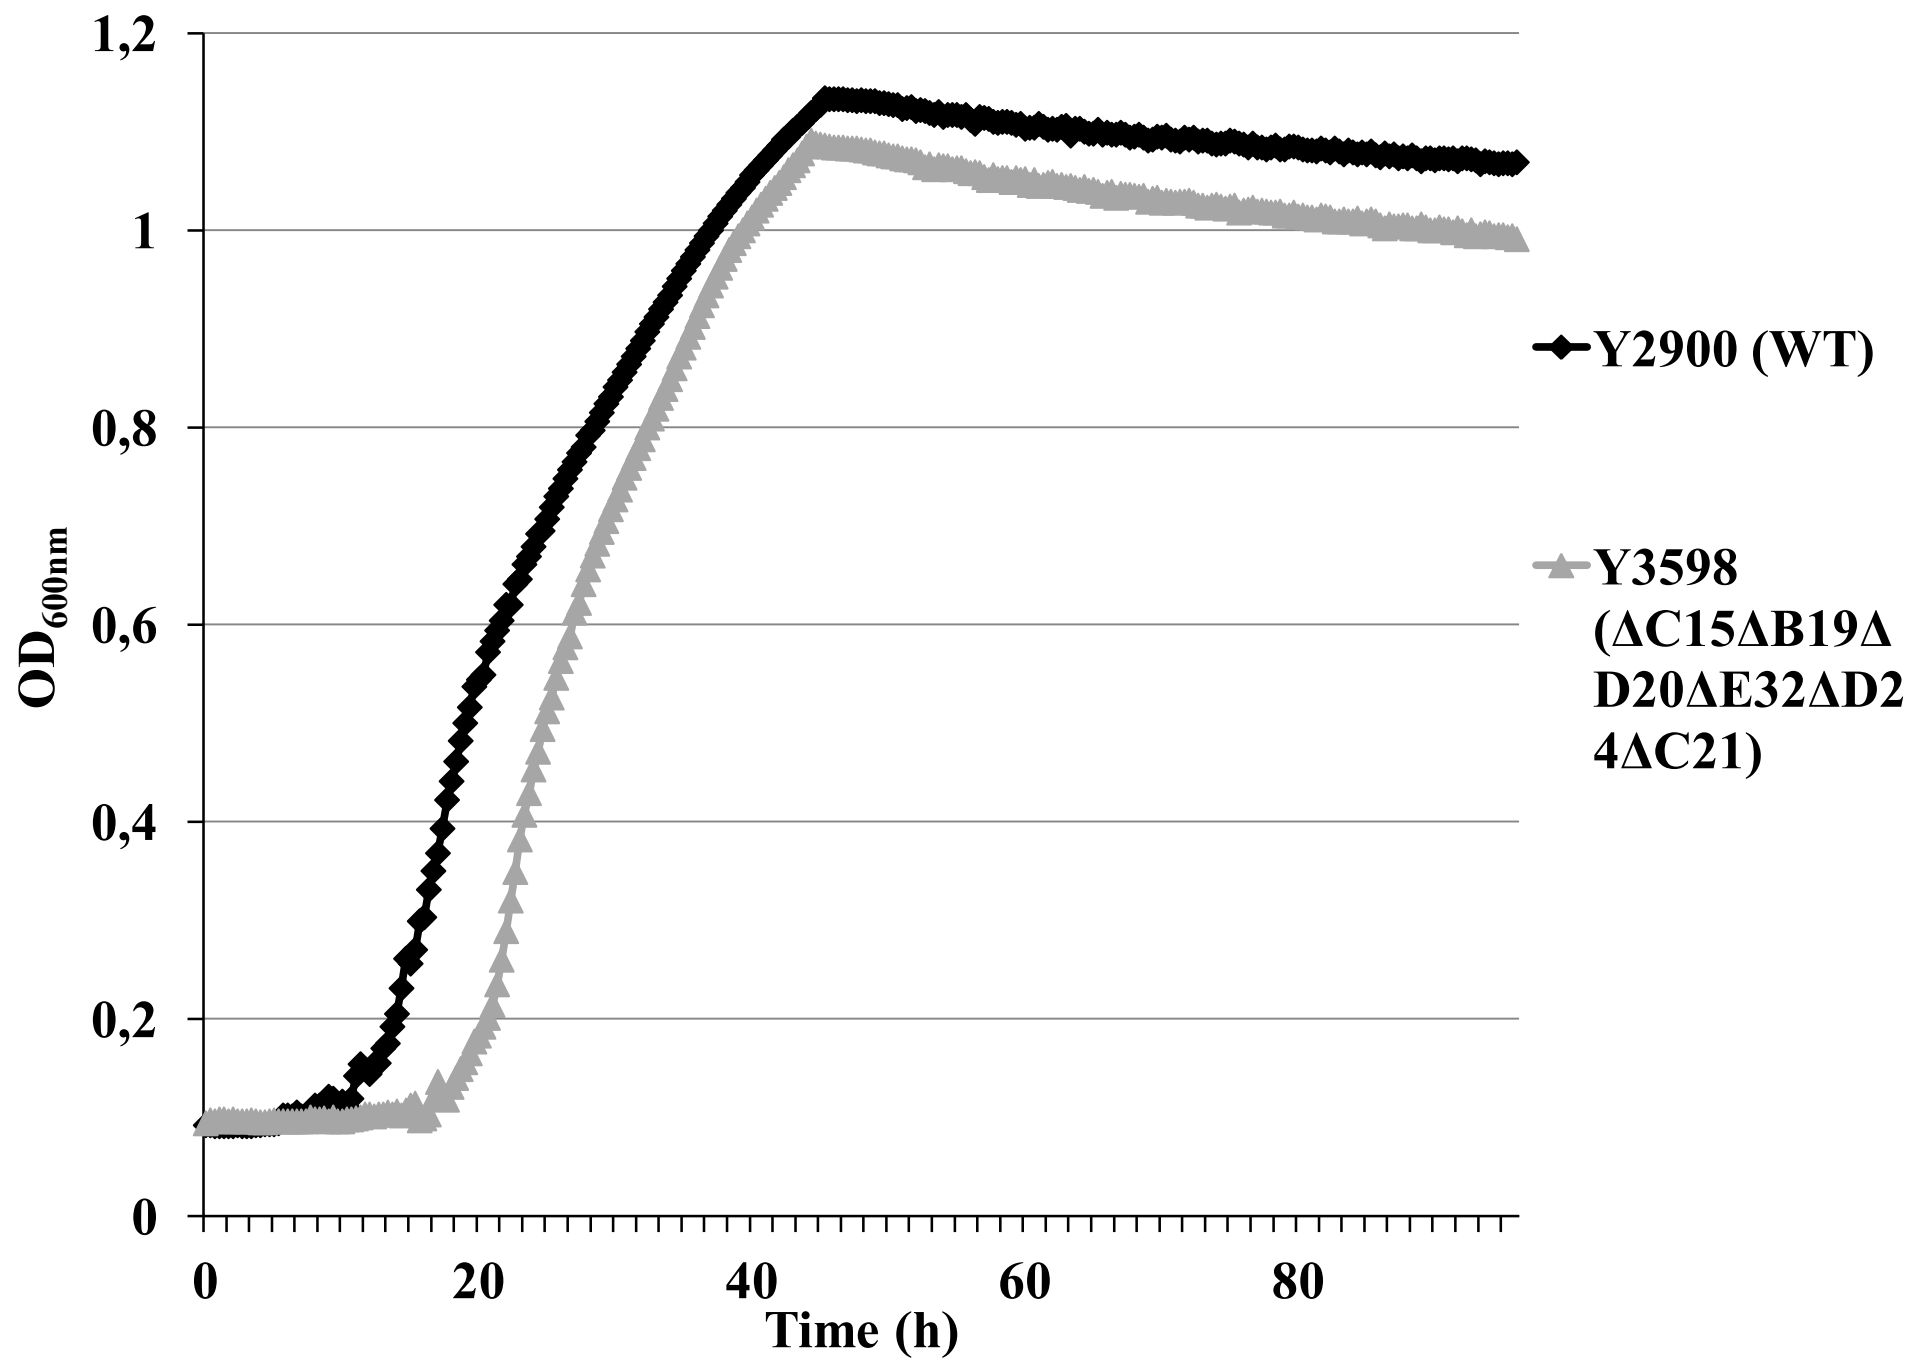

# Lactate 0,3 %

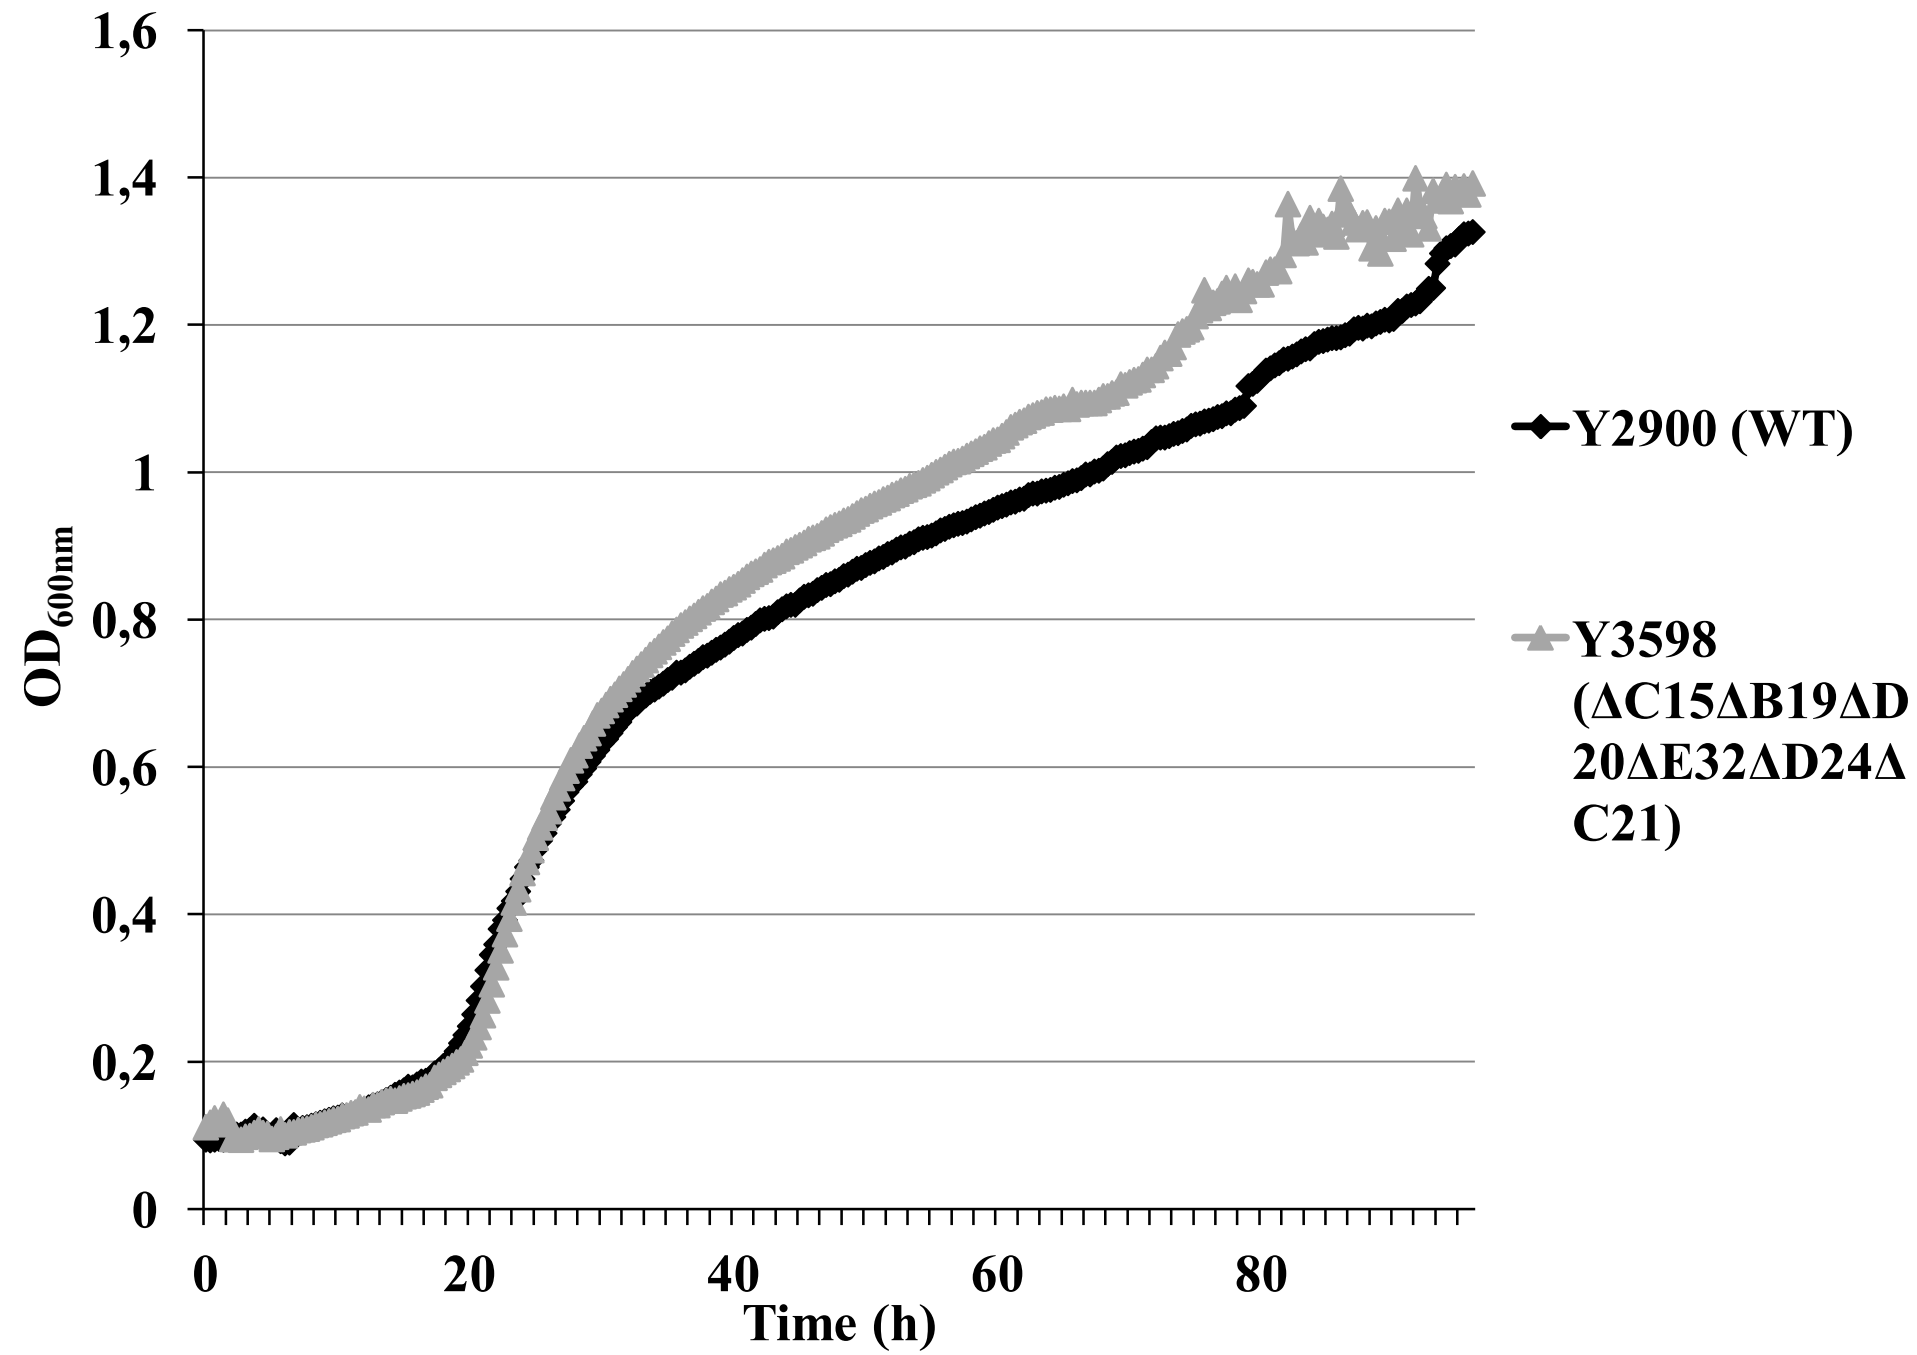

# Glucose 0,3 %

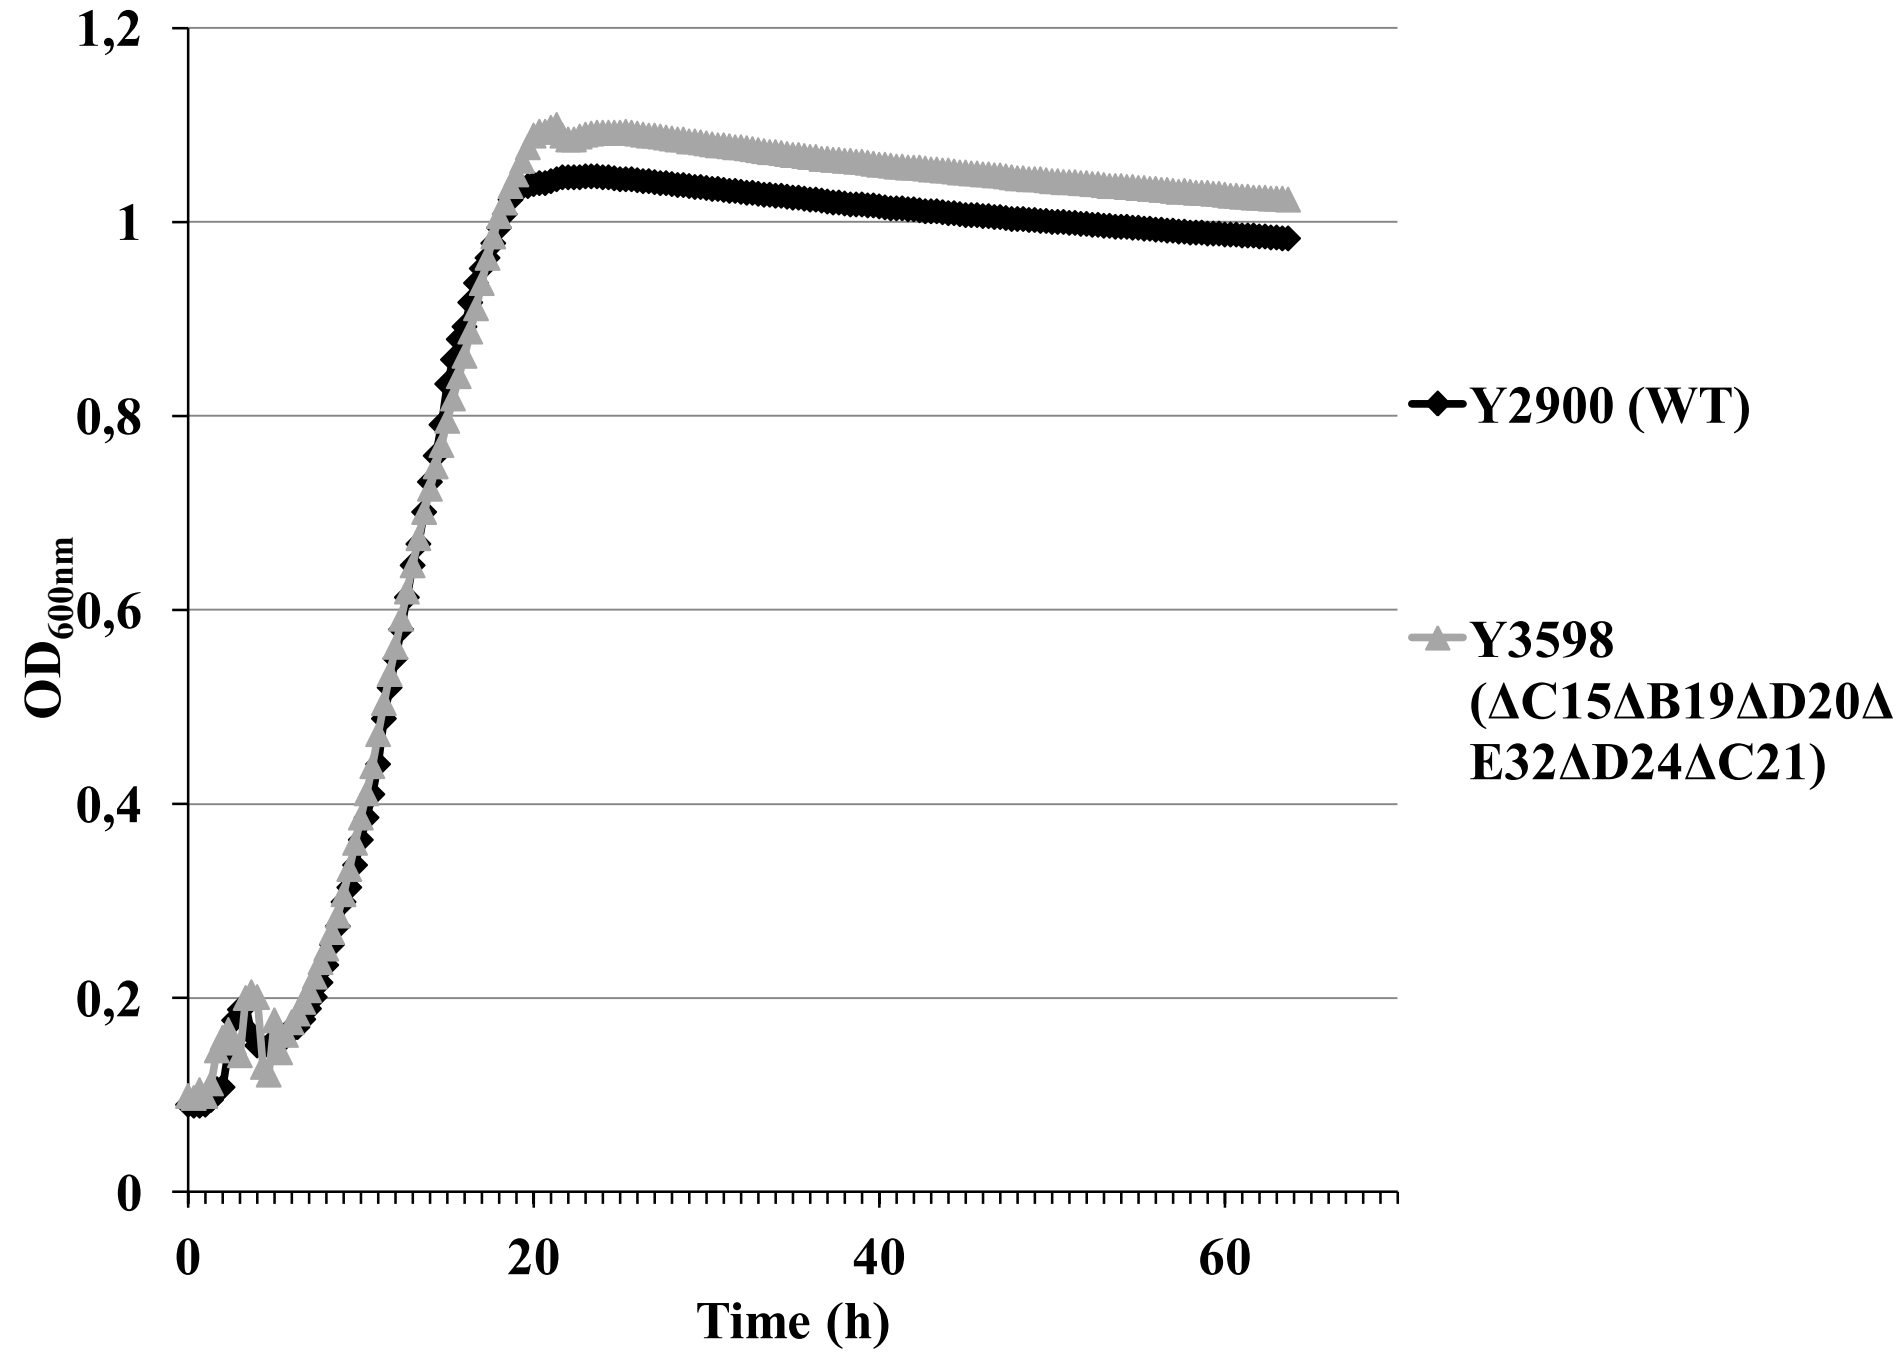

# Citrate 0,3 %

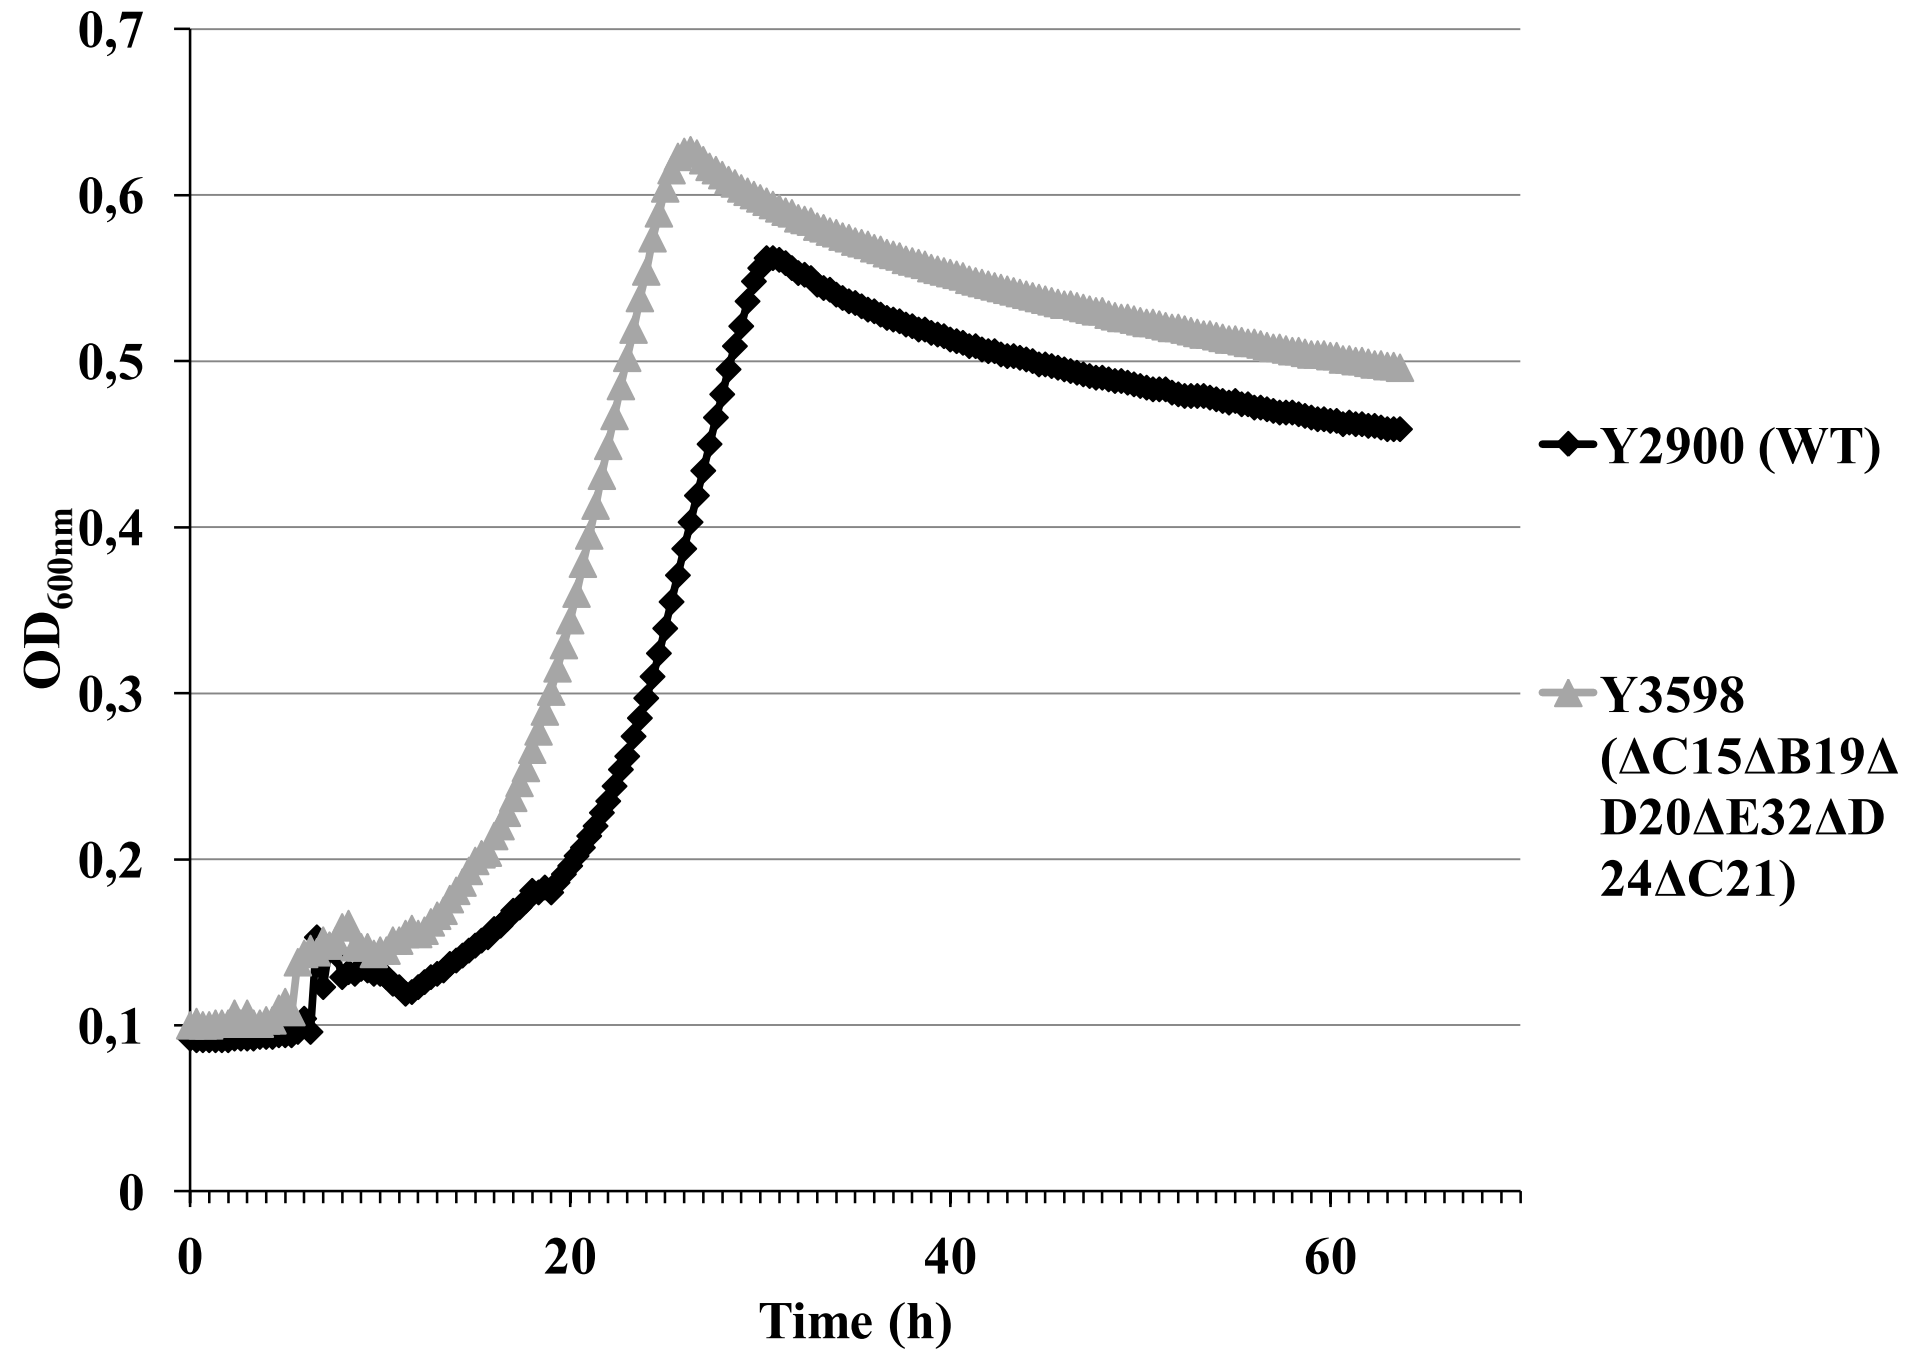

# Oxaloacetate 0,3 %

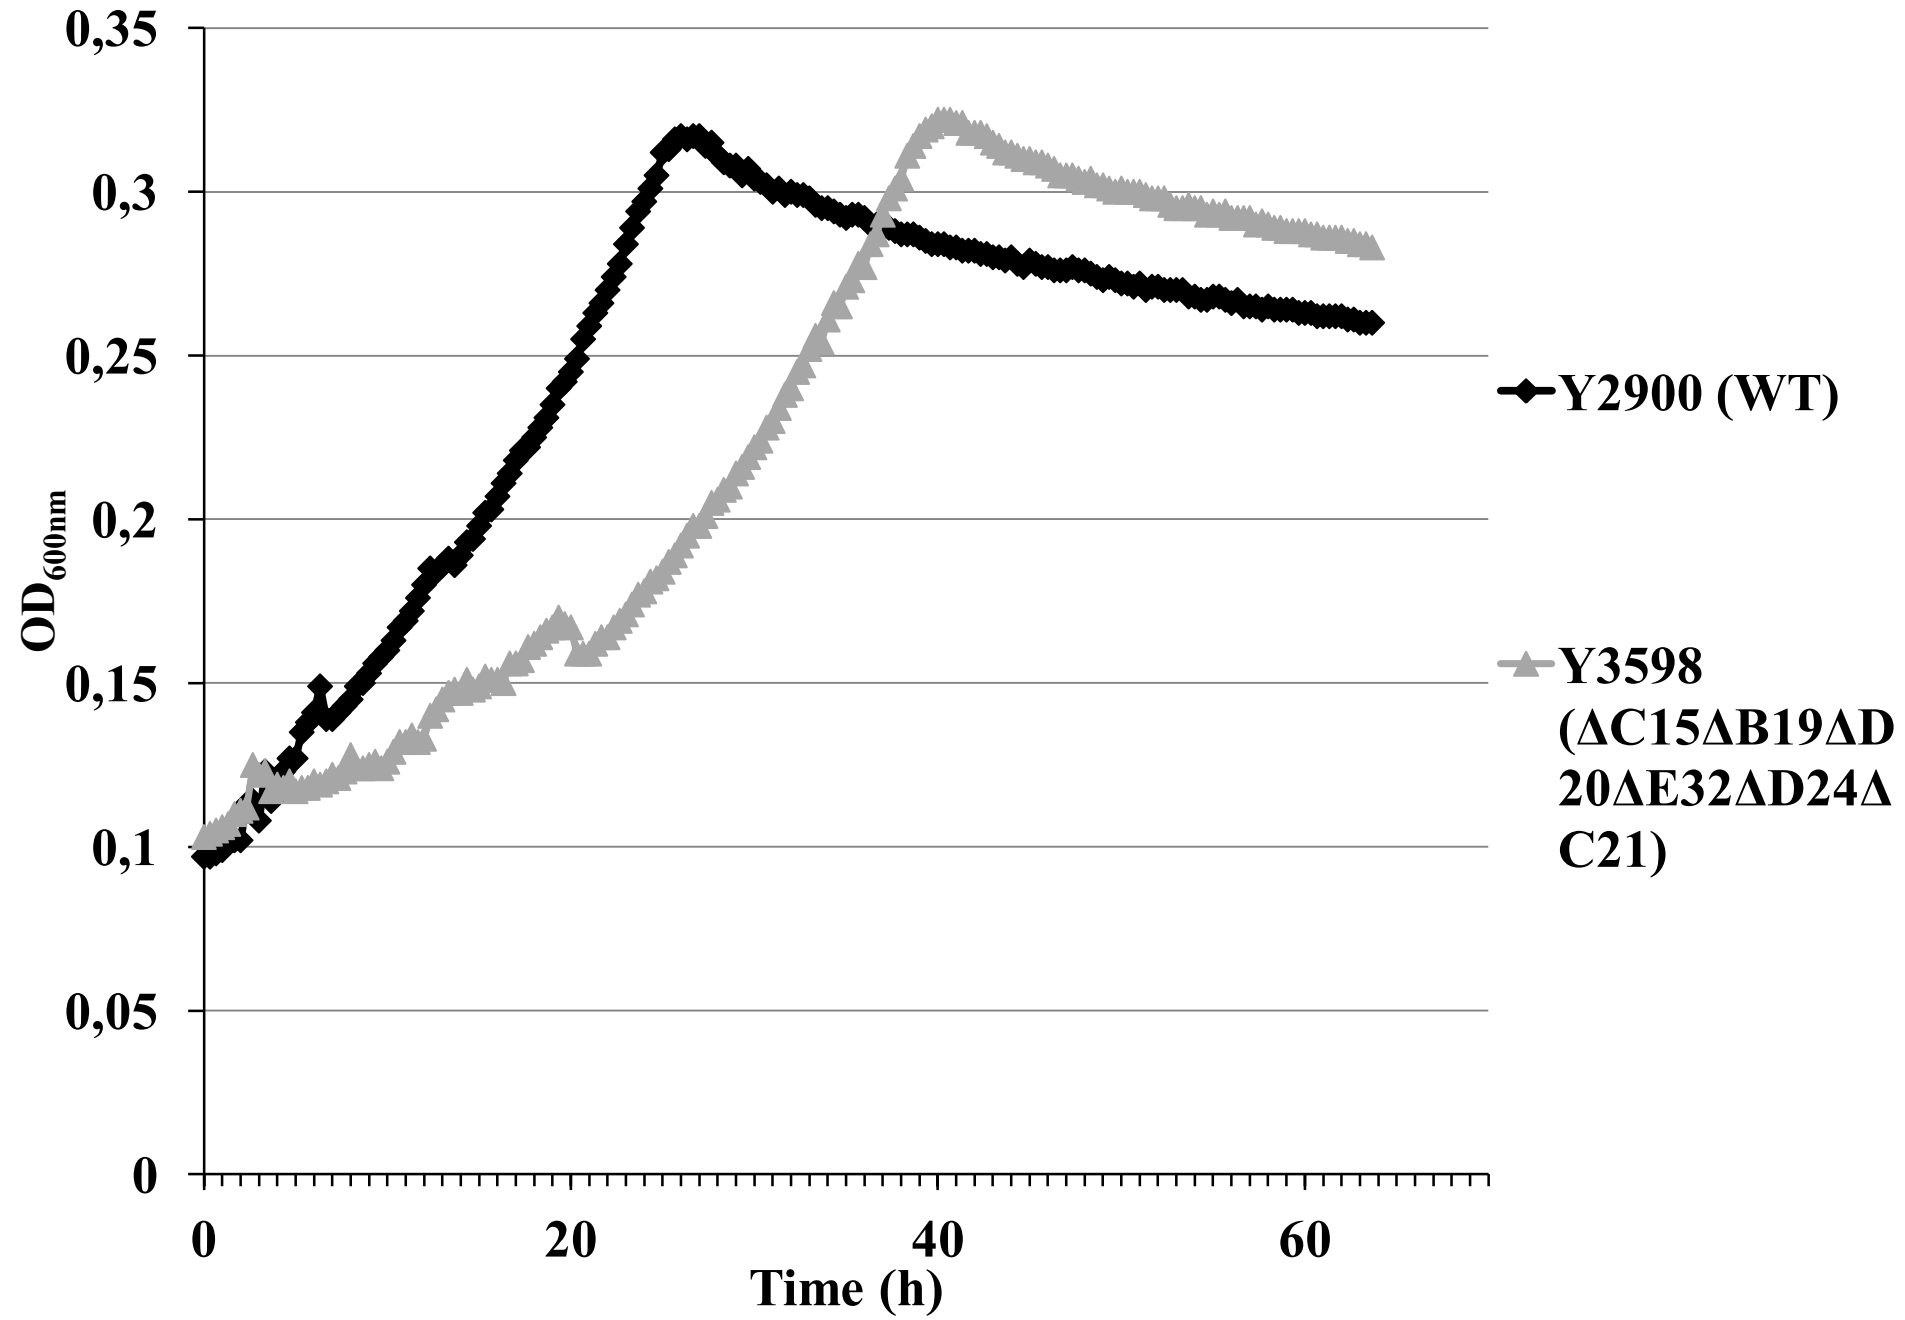

Supplement: mbo30004-0100-sd4.pdf [file mbo30004-0100-sd4.pdf]
